# Supplementary material
Source: PubMed Central journal article supplement (PMC3963832)
Supplement: NIHMS440430-supplement-S1.pdf [file NIHMS440430-supplement-S1.pdf]

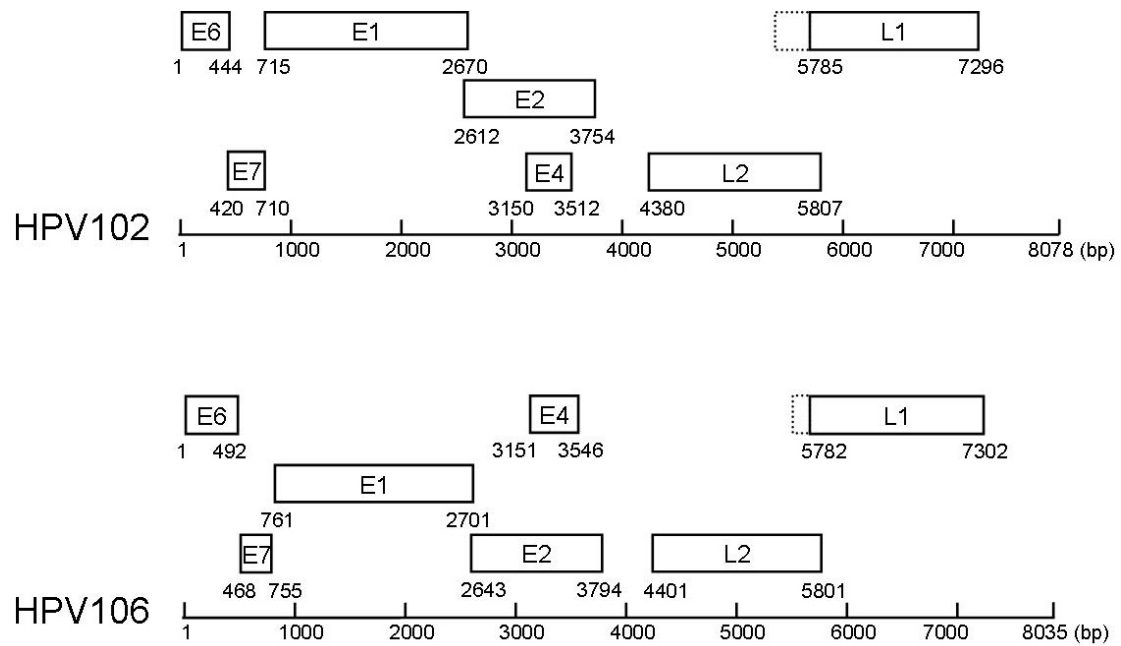

**Supplementary Fig. S1.** Location of the predicted ORFs of HPV102 and HPV106. Each ORF is represented as a rectangle occupying either the first, second, or third reading frames. Numbers show the nucleotide positions of the first start codon and the stop codons of each ORF. The additional 5' sequences in-frame with the predicted amino terminus of the HPV102 and HPV106 L1 ORFs are indicated with broken-line boxes.
